# Supplementary material
Source: PubMed Central journal article supplement (PMC4085495)
Supplement: cmi20146x1.pdf [file cmi20146x1.pdf]

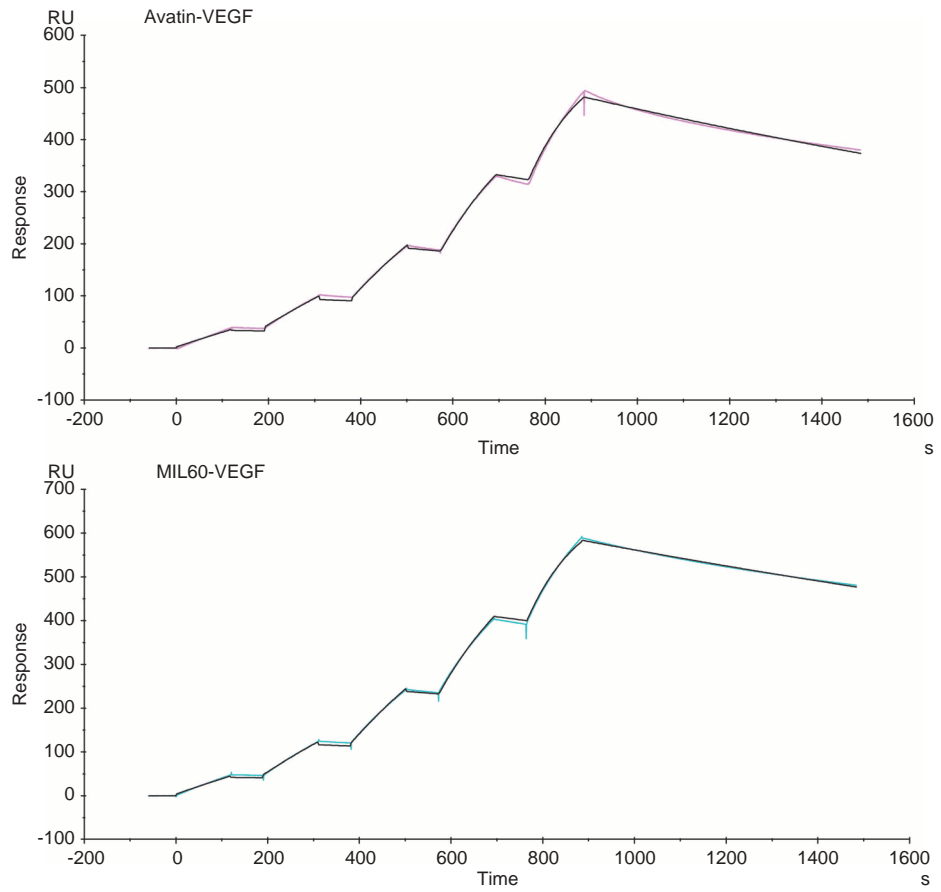

**Supplemental Figure 1** Binding curves of VEGF and antibodies by Biacore analysis. VEGF, vascular endothelial growth factor.

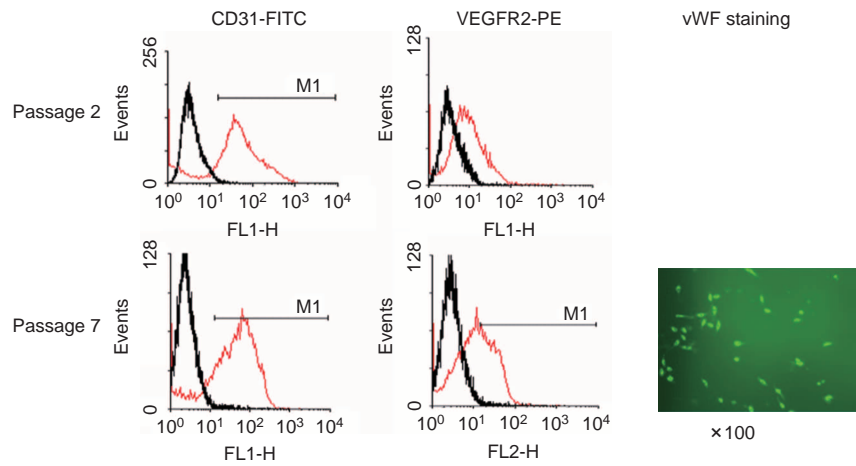

**Supplemental Figure 2** Identification of HUVEC (passages 2 and 7; CD31, VEGFR2 and vWF markers were detected). In this work, we used passages 2–7 of HUVEC in relative assays. HUVEC, human umbilical vein endothelial cell; VEGF, vascular endothelial growth factor.

**Supplemental Table 1** The mean and the standard deviation value of transwell (Figure 5b and c) and tube formation assays (Figure 5d and e)

| <i>Transwell assay (cell counting)</i> |              |              |               |             |
|----------------------------------------|--------------|--------------|---------------|-------------|
|                                        | 0 (control)  | 0.08 µg/ml   | 0.8 µg/ml     | 8 µg/ml     |
| MIL60                                  | 182.1±18.9   | 142.2±7.3    | 87.6±14.3*    | 49.4±16.4*  |
| Avastin                                | 182.1±18.9   | 163.8±8.3    | 94.6±20.9*    | 55.8±18.9*  |
| <i>Tube formation (µm per field)</i>   |              |              |               |             |
|                                        | 0 (control)  | 0.02 µg/ml   | 0.2 µg/ml     | 2 µg/ml     |
| MIL60                                  | 1734.2±404.2 | 1420.8±298.4 | 882.1±145.9*  | 509.8±78*   |
| Avastin                                | 1734.2±404.2 | 1621.5±119.4 | 1042.4±133.5* | 497.9±83.4* |

\*  $P < 0.05$ .
